# Supplementary material for: Re-Sequencing the Mitochondrial Genome Unveils a Novel Isomeric Form of NWB CMS Line in Radish and Functional Verification of Its Candidate Sterile Gene
Source: MDPI journal article supplement (doi:10.3390/horticulturae10040395), 2024-04-12
Supplement: s1 [file s1]

**Table S1. Types and number of tRNA**

|         |            |      |      |      |      |      |      |      |      |      |      |      |      |      |      |      |      |       |
|---------|------------|------|------|------|------|------|------|------|------|------|------|------|------|------|------|------|------|-------|
| TibetA  | tRNA(type) | trnY | trnI | trnM | trnQ | trnH | trnS | trnW | trnP | trnL | trnE | trnC | trnN | trnT | trnG | trnK | trnD | total |
|         | Number     | 4    | 1    | 4    | 1    | 1    | 3    | 1    | 1    | 1    | 1    | 1    | 2    | 1    | 1    | 1    | 1    | 25    |
| Tibet B | tRNA(type) | trnY | trnI | trnM | trnQ | trnH | trnS | trnW | trnP | trnL | trnE | trnC | trnN | trnT | trnG | trnK | trnD | total |
|         | Number     | 4    | 2    | 4    | 1    | 1    | 3    | 1    | 2    | 1    | 1    | 1    | 1    | 1    | 1    | 1    | 1    | 26    |

**Table S2. Number of positive transgenic T<sub>1</sub> plants obtained with each constructs**

| <i>Constructs</i> | <i>No.of PCR positive transgenic plants</i> | <i>No.of fertile plants</i> | <i>No.of sterile plants</i> |
|-------------------|---------------------------------------------|-----------------------------|-----------------------------|
| V35S              | 36                                          | 36                          | 0                           |
| VAP3-1            | 8                                           | 0                           | 8                           |
| VAP3-2            | 6                                           | 0                           | 6                           |
| VAP3-CK           | 35                                          | 35                          | 0                           |

**Table S3. PCR and qRT-PCR primers used in this study.**

| Primer name | Primer sequence (5' - 3')                           | Application                                |
|-------------|-----------------------------------------------------|--------------------------------------------|
| AP3BR       | CGGGATCCATTCTTCTCTCTTTGTTTAATC                      | amplication of <i>AP3</i> promoter         |
| AP3F        | GGGGTACCCAGTAACTGTGGCCAACCTAGTTTGAAAC               | amplication of <i>AP3</i> promoter         |
| coxVIF      | CGGGATCCATGCTTTCACCTACGTCAATCTA                     | amplication of <i>coxVI</i> presequence    |
| T-463aL     | ACAGCCATCGAACCAGATTTTTTCATAAGCAGATATCTAGAGCTACACAAA | amplicationof <i>cox VI</i> presequence    |
| T-463aF     | TTTGTGTAGCTCTAGATATCTGCTTATGAAAAATCTGGTTCGATGGCTGT  | amplication of <i>orf463a</i>              |
| 463aF       | CGGGATCCATGAAAAATCTGGTTCGATGG                       | amplication of <i>orf463a</i>              |
| 463aL       | ACGCGTCGACTTATTTCTGCTTTGTAAAAATTGGAAAG              | amplication of <i>orf463a</i>              |
| NOSR        | AACTGCAGGTTTCTTAAGATTGAATCCT                        | amplication of NOS sequence                |
| NOSF        | CCCAGCTTCCCGATCTAGTAACATAGA                         | amplication of NOS sequence                |
| VNOF        | GGGGTACCCAGCCTGGGGTGCCTAATGAGT                      | amplication of 35S promoter                |
| VNOL        | CGGGATCCGGTTCGATCGACAGATCTGCGA                      | amplication of 35S promoter                |
| q-orf463a-F | ACACAGCCGCCATATCAATTTTCG                            | qRT-PCR                                    |
| q-orf463a-R | CGGTCATTGTCCTGACGGTTCTG                             | qRT-PCR                                    |
| q-TUB2-F    | ATCCGTGAAGAGTACCCAGAT                               | qRT-PCR                                    |
| q- TUB2-R   | AAGAACCATGCACTCATCAGC                               | qRT-PCR                                    |
| NOS-F       | GTATTTGTTTAGGCTCCGGC                                | Verification of transgenic positive plants |
| NOS-R       | CAAGACCGGCAACAGGATTCAATC                            |                                            |
